# Supplementary material
Source: PubMed Central journal article supplement (PMC10716611)

n

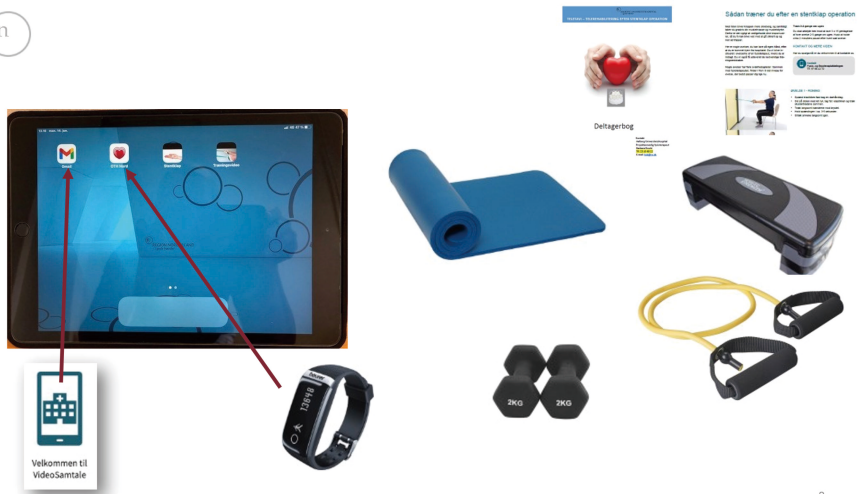

Figure 1S Technologies used in the Tele-TAVI study.

Supplement: jgc-20-11-767-S1.pdf [file jgc-20-11-767-S1.pdf]
